# Supplementary material for: Accumulation of soil organic C and N in planted forests fostered by tree species mixture
Source: Copernicus journal article supplement (doi:10.5194/bg-14-3937-2017), 2017-09-11
Supplement: Supplementary file 1 [file bg-14-3937-2017-supplement.pdf]

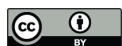

## *Supplement of*

# **Accumulation of soil organic C and N in planted forests fostered by tree species mixture**

**Y. Liu et al.**

*Correspondence to:* Pifeng Lei ([pifeng.lei@outlook.com](mailto:pifeng.lei@outlook.com))

The copyright of individual parts of the supplement might differ from the CC BY 3.0 License.

**Table S1.** Fine root biomass in pure *Pinus*, *Cinnamomum* and mixed *Pinus-Cinnamomum* stands in 0-10 cm, 10-20 cm and 20-30 cm soil depth at the age of 10, 24 and 45 years (in g m<sup>-2</sup>). Datum shows mean  $\pm$  standard deviation. Different letters indicate significant differences among different stands within the same soil profile and age stages ( $p<0.05$ ).

| Soil depth | <i>Pinus</i> stands  |                     |                     | <i>Pinus - Cinnamomum</i> stands |                      |                     | <i>Cinnamomum</i> stands |                      |                     |
|------------|----------------------|---------------------|---------------------|----------------------------------|----------------------|---------------------|--------------------------|----------------------|---------------------|
|            | 10-yr-old            | 24-yr-old           | 45-yr-old           | 10-yr-old                        | 24-yr-old            | 45-yr-old           | 10-yr-old                | 24-yr-old            | 45-yr-old           |
| 0-10 cm    | 153.83 $\pm$ 29.68 b | 124.9 $\pm$ 29 a    | 44.78 $\pm$ 20.14 a | 270.4 $\pm$ 31.68 a              | 175.71 $\pm$ 61.15 a | 64.94 $\pm$ 12.29 a | 227.84 $\pm$ 27.65 b     | 117.37 $\pm$ 22.51 a | 76.58 $\pm$ 14.94 a |
| 10-20 cm   | 70.41 $\pm$ 12.51 b  | 88.03 $\pm$ 12.1 a  | 63.85 $\pm$ 27.04 a | 118.77 $\pm$ 17.72 a             | 72.34 $\pm$ 11.27 ab | 46.99 $\pm$ 8.47 a  | 98.4 $\pm$ 15.6 ab       | 58.73 $\pm$ 14.25 b  | 25.09 $\pm$ 7.39 a  |
| 20-30 cm   | 45.95 $\pm$ 7.72 b   | 78.91 $\pm$ 15.34 a | 45.46 $\pm$ 22.03 a | 128.19 $\pm$ 51.48 a             | 51.71 $\pm$ 10.11 a  | 24.05 $\pm$ 7.97 a  | 51.57 $\pm$ 8.11 b       | 40.12 $\pm$ 7.37 a   | 33.11 $\pm$ 10.07 a |
